# Supplementary material for: ΔNp63 regulates IL-33 and IL-31 signaling in atopic dermatitis
Source: PubMed Central journal article supplement — Cell Death Differ. 2016 Jan 15;23(6):1073–85. doi: 10.1038/cdd.2015.162 (PMC4987726; doi:10.1038/cdd.2015.162), 2016-01-15
Supplement: cdd2015162x4.pdf [file cdd2015162x4.pdf]

**Supplemental Table 1. List of differentially expressed genes in transgenic epidermis compared to normal epidermis as identified by RNA-seq analysis.**

| <b>Gene ID</b> | <b>Fold Change (TG/WT; log2)</b> |
|----------------|----------------------------------|
| Sprr2f         | 8.74388                          |
| Lce3a          | 8.51545                          |
| Lce3b          | 7.91593                          |
| Eif2s3y        | 7.77623                          |
| Sprr2g         | 7.66355                          |
| Pitx1          | 7.30439                          |
| Snord82        | 7.261192291                      |
| Mir3061        | 7.230231839                      |
| Lce3d          | 7.11761                          |
| Krt24          | 7.09545                          |
| Klk12          | 6.75883                          |
| Sprr2e         | 6.75752                          |
| Lce3f          | 6.74301                          |
| Hs3st1         | 6.3679                           |
| Oas1e          | 6.10455                          |
| Aknad1         | 5.78007                          |
| Spink7         | 5.7281                           |
| Lce3e          | 5.72359                          |
| Ptgs2          | 5.53501                          |

|           |             |
|-----------|-------------|
| Sprr1b    | 5.4016      |
| Nptx1     | 5.25176     |
| Defb3     | 5.15043376  |
| Sprr2d    | 5.07832     |
| Defa-ps12 | 5.031853906 |
| Il33      | 4.95411     |
| Otud7a    | 4.84596     |
| Nppb      | 4.80635     |
| Meox1     | 4.63716     |
| Sprr2i    | 4.62066     |
| Il20ra    | 4.61083     |
| Sh2d5     | 4.5835      |
| S100a9    | 4.55551     |
| Lrat      | 4.44982     |
| Mmp13     | 4.39814     |
| Sprr2j-ps | 4.38237     |
| Casp4     | 4.34017     |
| Esr1      | 4.31886     |
| Pde1b     | 4.31683     |
| Serpinb6c | 4.31001     |
| Epgn      | 4.26855     |
| Dnmt3l    | 4.20641     |
| Mmp12     | 4.13267     |

|               |         |
|---------------|---------|
| Krt6b         | 4.1278  |
| Gm5077        | 4.11236 |
| Krt6a         | 4.10377 |
| Spr2h         | 4.09061 |
| Akr1b8        | 4.01454 |
| Lce3c         | 3.89865 |
| Mmp9          | 3.89669 |
| Lox           | 3.86466 |
| Gm12505       | 3.84395 |
| Gm5414        | 3.83489 |
| Bmp6          | 3.81786 |
| Tie1          | 3.76902 |
| Pla2g4e       | 3.73949 |
| Ifi204        | 3.68234 |
| Cdhr1         | 3.67326 |
| Ear5          | 3.66945 |
| Dpep1         | 3.66706 |
| Fgfbp3        | 3.66685 |
| Gpr128        | 3.665   |
| Ifi202b       | 3.65865 |
| S100a8        | 3.57016 |
| Krt84         | 3.51608 |
| 4732456N10Rik | 3.50794 |

|         |         |
|---------|---------|
| Dram1   | 3.41095 |
| Zbtb16  | 3.39995 |
| Rgs5    | 3.39886 |
| B3galt5 | 3.37274 |
| St3gal1 | 3.33859 |
| Col3a1  | 3.29765 |
| C1s     | 3.27552 |
| Gda     | 3.26659 |
| Pdk4    | 3.24795 |
| Krt16   | 3.17335 |
| Hspa4l  | 3.16153 |
| Tbkbp1  | 3.1597  |
| Abcg4   | 3.11771 |
| Slc16a9 | 3.08383 |
| Gapdhs  | 3.06904 |
| Tle6    | 3.06241 |
| Tubb3   | 3.05969 |
| Col1a1  | 3.04834 |
| Kcnq2   | 3.04628 |
| Thbs2   | 3.02366 |
| Dpt     | 3.01411 |
| Bcl2l15 | 3.01311 |
| Gpx2    | 3.00799 |

|         |         |
|---------|---------|
| Sprr1a  | 3.00242 |
| Ptpn5   | 2.98923 |
| Gem     | 2.9782  |
| Cxcl1   | 2.97491 |
| Cd101   | 2.96591 |
| Ada     | 2.95284 |
| Etv4    | 2.95222 |
| Gjb6    | 2.94922 |
| Sprr2b  | 2.92263 |
| Cxcl12  | 2.88564 |
| Adh7    | 2.88523 |
| Slco2b1 | 2.87018 |
| Cd80    | 2.86791 |
| Fez1    | 2.86382 |
| Tmem8   | 2.84301 |
| Olf1033 | 2.83961 |
| Nrg1    | 2.83504 |
| Elk3    | 2.82782 |
| Gpr116  | 2.81533 |
| Nt5e    | 2.80316 |
| Hyal1   | 2.76566 |
| Lyz2    | 2.7615  |
| Beta-s  | 2.75728 |

|          |         |
|----------|---------|
| AI607873 | 2.75696 |
| Odc1     | 2.75653 |
| Cdh5     | 2.75292 |
| Cnga3    | 2.73909 |
| Aldh1a3  | 2.7249  |
| Bdkrb2   | 2.72016 |
| Ly6c1    | 2.70458 |
| Procr    | 2.69919 |
| Ggt7     | 2.6904  |
| Has2     | 2.68233 |
| Piezo2   | 2.67976 |
| Best2    | 2.67354 |
| Mfap4    | 2.66744 |
| Hbegf    | 2.6624  |
| Rap1gap  | 2.66095 |
| Sparcl1  | 2.65513 |
| Slc6a20a | 2.64526 |
| Dusp6    | 2.64454 |
| Sgpp2    | 2.62841 |
| Acot4    | 2.6052  |
| Arhgap22 | 2.60503 |
| Wdr92    | 2.59362 |
| Atxn1    | 2.58742 |

|               |         |
|---------------|---------|
| Tifa          | 2.56406 |
| Aqp1          | 2.55007 |
| Gm11596       | 2.54506 |
| F13a1         | 2.54425 |
| Fgd5          | 2.53764 |
| Klhl29        | 2.52949 |
| Afap1l1       | 2.5211  |
| Socs3         | 2.503   |
| C1ra          | 2.46523 |
| Ggact         | 2.45621 |
| Pecam1        | 2.45135 |
| Msi1          | 2.43905 |
| Itga7         | 2.43431 |
| Fbln5         | 2.42933 |
| Nat8l         | 2.42786 |
| Clcf1         | 2.42166 |
| Trpc1         | 2.4173  |
| Fscn1         | 2.41673 |
| Fchsd1        | 2.4136  |
| Icosl         | 2.41004 |
| Dnaaf3        | 2.40809 |
| 9530077C05Rik | 2.406   |
| Ltb4r1        | 2.40039 |

|         |         |
|---------|---------|
| Lum     | 2.38976 |
| Angptl4 | 2.38934 |
| Ppp2r2c | 2.36857 |
| Fbln7   | 2.35967 |
| Duox1   | 2.35801 |
| Nat6    | 2.34446 |
| Otop2   | 2.32795 |
| Gfpt2   | 2.32695 |
| Tbx2    | 2.32634 |
| Ntn1    | 2.316   |
| Igfbp6  | 2.31122 |
| Kcnh2   | 2.30893 |
| Nos1ap  | 2.3089  |
| Ccdc71l | 2.29689 |
| Adarb1  | 2.28506 |
| Pde8a   | 2.27473 |
| Fam110c | 2.27145 |
| Spire2  | 2.26366 |
| Anxa3   | 2.25673 |
| Pdgfra  | 2.24547 |
| Gsta4   | 2.23768 |
| Matn2   | 2.23197 |
| C1rl    | 2.23184 |



|               |         |
|---------------|---------|
| Tns4          | 2.22977 |
| Stx11         | 2.22484 |
| Ethe1         | 2.21413 |
| Adamts2       | 2.20959 |
| Krtap4-8      | 2.1941  |
| Heg1          | 2.19135 |
| Nxph3         | 2.1844  |
| Ddr2          | 2.18347 |
| Dhrs9         | 2.17637 |
| Gm11595       | 2.1758  |
| Foxq1         | 2.17263 |
| Scrg1         | 2.16732 |
| H2-Q5         | 2.15974 |
| Serpinb6e     | 2.15124 |
| Eif4e3        | 2.14429 |
| Akr1b10       | 2.13617 |
| 2610528A11Rik | 2.1323  |
| Agmo          | 2.13052 |
| Xrcc2         | 2.12928 |
| Slc16a3       | 2.12457 |
| Stom          | 2.12263 |
| Nlrc5         | 2.12057 |
| Dsg1c         | 2.11649 |

|           |         |
|-----------|---------|
| Oaf       | 2.11311 |
| Thbd      | 2.11219 |
| Casq2     | 2.11195 |
| Serpinb11 | 2.10811 |
| Fam167a   | 2.09963 |
| Eln       | 2.0953  |
| Col1a2    | 2.08926 |
| Ncmap     | 2.08708 |
| Pear1     | 2.08503 |
| Prss12    | 2.07856 |
| Wipi1     | 2.0763  |
| Krtap4-9  | 2.05754 |
| Slc16a2   | 2.05604 |
| Acta1     | 2.05539 |
| Pmaip1    | 2.05361 |
| Serinc2   | 2.04925 |
| Zfp365    | 2.0466  |
| Col6a2    | 2.04539 |
| Krtap1-4  | 2.04178 |
| Axl       | 2.03756 |
| Flnc      | 2.03506 |
| S1pr3     | 2.03246 |
| Lypd3     | 2.03198 |

|               |             |
|---------------|-------------|
| Spry4         | 2.02951     |
| Ngfr          | 2.02628     |
| Defb4         | 2.026166196 |
| Cdo1          | 2.02101     |
| Fzd1          | 2.01678     |
| Tpm2          | 2.01256     |
| Gjb2          | 2.01128     |
| Tcf23         | 2.01074     |
| Fbn1          | 2.01066     |
| Ehf           | 2.00015     |
| Crlf1         | 1.99264     |
| Gm11564       | 1.98765     |
| Casp1         | 1.98535     |
| C2cd4b        | 1.97592     |
| Plvap         | 1.96638     |
| Capg          | 1.95551     |
| Gm7694        | 1.94877     |
| Gm11567       | 1.94789     |
| 4930539E08Rik | 1.94686     |
| Sat1          | 1.94046     |
| Ccl22         | 1.93733     |
| Gcnt4         | 1.9344      |
| Artn          | 1.93341     |

|           |             |
|-----------|-------------|
| Trp63     | 1.93254     |
| Adcy2     | 1.92763     |
| Gm20752   | 1.925       |
| Ret       | 1.92339     |
| Slc39a6   | 1.92246     |
| Phlda1    | 1.92105     |
| Gm11568   | 1.92029     |
| Dnase1l3  | 1.92018     |
| Pcbp3     | 1.91964     |
| Klk13     | 1.90782     |
| Ror2      | 1.90764     |
| Olfml2b   | 1.90653     |
| Pmepa1    | 1.89641     |
| Rab31     | 1.88492     |
| Tspan3    | 1.88299     |
| Gpm6a     | 1.87838     |
| H2-K1     | 1.87598     |
| Gstm5     | 1.87275     |
| Sqrdl     | 1.87168     |
| Slfn10-ps | 1.86966     |
| Cd274     | 1.8683      |
| Prl2c3    | 1.865902982 |
| Enpp2     | 1.86442     |

|          |             |
|----------|-------------|
| H2-D1    | 1.8597      |
| Fam171a1 | 1.85884     |
| Irf4     | 1.85876     |
| Gyk      | 1.85637     |
| Krt75    | 1.85391     |
| Plaur    | 1.85376     |
| Phyh     | 1.85294     |
| Atp12a   | 1.85104     |
| Cd14     | 1.85021     |
| Trib2    | 1.84802     |
| Oca2     | 1.84546     |
| Arntl2   | 1.84522     |
| Smim3    | 1.84294     |
| Bdnf     | 1.84234     |
| Areg     | 1.83907     |
| Lrp8     | 1.83387     |
| Kif21b   | 1.82623     |
| Pxdc1    | 1.82595     |
| Pinlyp   | 1.82586     |
| Klk6     | 1.82547     |
| Gm5416   | 1.81913     |
| Ccr4     | 1.81642     |
| Kdm5d    | 1.815333593 |

|          |         |
|----------|---------|
| Rnf152   | 1.81435 |
| Serpine1 | 1.8085  |
| Slc7a8   | 1.79851 |
| Crip2    | 1.7982  |
| Nod2     | 1.79547 |
| Dusp7    | 1.7946  |
| Zyx      | 1.79091 |
| Zfp92    | 1.78781 |
| Synpr    | 1.78524 |
| Ifitm3   | 1.78128 |
| Mill1    | 1.77834 |
| Abcc4    | 1.77764 |
| Serpinb2 | 1.77469 |
| Bcl3     | 1.77113 |
| Cnksr3   | 1.7697  |
| Mgat5b   | 1.76182 |
| Dnajb13  | 1.76141 |
| Igf1r    | 1.75806 |
| Id3      | 1.75308 |
| Mapk11   | 1.7528  |
| Runx2    | 1.74564 |
| Nmb      | 1.7448  |
| Ar       | 1.74397 |

|           |             |
|-----------|-------------|
| Tnfaip3   | 1.7395      |
| Fam211b   | 1.73396     |
| Lama2     | 1.72459     |
| Id1       | 1.72081     |
| Trp53inp2 | 1.71959     |
| Klhl21    | 1.71916     |
| Zranb3    | 1.71907     |
| Krtap4-16 | 1.71658     |
| Lhfp      | 1.71611     |
| Prl2c5    | 1.712080676 |
| Fabp5     | 1.71155     |
| Cstb      | 1.71082     |
| Fblim1    | 1.70478     |
| Cd34      | 1.70051     |
| Ptprcap   | 1.7003      |
| Syp       | 1.70027     |
| Scn4b     | 1.69844     |
| Car5b     | 1.69319     |
| Ifi203    | 1.6902      |
| Ly6a      | 1.68985     |
| Lmod2     | 1.68863     |
| Phyhipl   | 1.68559     |
| Tbc1d2    | 1.68397     |

|          |         |
|----------|---------|
| Arid5a   | 1.68384 |
| Grik3    | 1.68188 |
| Trpm6    | 1.68036 |
| Helz2    | 1.6772  |
| Osgin1   | 1.67107 |
| Bcar3    | 1.6702  |
| Slc25a45 | 1.66592 |
| Mapk6    | 1.65983 |
| Chn2     | 1.65472 |
| Trps1    | 1.65425 |
| Capn2    | 1.65204 |
| Gch1     | 1.65012 |
| Il1r2    | 1.64899 |
| Trnp1    | 1.6426  |
| Apoe     | 1.63951 |
| S100a7a  | 1.63722 |
| Lonrf3   | 1.63522 |
| Fzd5     | 1.63476 |
| Slc38a2  | 1.63435 |
| Gipc2    | 1.6336  |
| Srgn     | 1.63212 |
| Tyrp1    | 1.62959 |
| Trim13   | 1.62943 |



|               |         |
|---------------|---------|
| Tinagl1       | 1.62923 |
| Ltb4r2        | 1.62768 |
| Sgms2         | 1.62249 |
| Osmr          | 1.60671 |
| 4632428N05Rik | 1.60464 |
| Irx5          | 1.60374 |
| Slc6a9        | 1.59997 |
| Tle2          | 1.59045 |
| Il31ra        | 1.5898  |
| Krtap4-7      | 1.58677 |
| Tox3          | 1.58622 |
| Myl9          | 1.58579 |
| Abat          | 1.58078 |
| BC037704      | 1.57218 |
| St3gal6       | 1.5714  |
| Pbx1          | 1.56937 |
| Capns1        | 1.56794 |
| Atp1b1        | 1.56636 |
| Smtn          | 1.5649  |
| Mrpl28        | 1.56479 |
| Cdcp1         | 1.55074 |
| S100a6        | 1.54684 |
| Slit3         | 1.54381 |

|         |         |
|---------|---------|
| Xylt1   | 1.54331 |
| Ldlrap1 | 1.54062 |
| Duoxa1  | 1.5342  |
| Eya2    | 1.53101 |
| Apobec1 | 1.52986 |
| Ehd3    | 1.52677 |
| Fermt3  | 1.52416 |
| Dyrk3   | 1.52018 |
| Prkca   | 1.5185  |
| Optn    | 1.51299 |
| Fam212a | 1.51268 |
| Tmprss2 | 1.51059 |
| Rnd3    | 1.50888 |
| Actbl2  | 1.50254 |
| Hdgfrp3 | 1.50158 |
| S1pr4   | 1.48835 |
| Col15a1 | 1.48656 |
| Pdlim7  | 1.4854  |
| Foxp1   | 1.47828 |
| Fmnl2   | 1.47171 |
| Foxn1   | 1.46796 |
| Map4k4  | 1.46447 |
| Maff    | 1.46147 |

|               |         |
|---------------|---------|
| Hccs          | 1.46129 |
| Stc1          | 1.45974 |
| Gm11559       | 1.45952 |
| Prkg2         | 1.45843 |
| Irs2          | 1.45778 |
| Zcchc10       | 1.45733 |
| Slc7a11       | 1.45551 |
| 1190003J15Rik | 1.45449 |
| Fabp4         | 1.45422 |
| Tenm3         | 1.45247 |
| Ccdc88b       | 1.44989 |
| Orai2         | 1.44524 |
| Prss22        | 1.44263 |
| Hmgcs2        | 1.43701 |
| Etv5          | 1.43596 |
| Adamts20      | 1.43567 |
| Nkpd1         | 1.43496 |
| Krtap9-1      | 1.43488 |
| Pard3b        | 1.43363 |
| Pcdh7         | 1.43122 |
| Krtap1-3      | 1.42963 |
| Zfp36         | 1.42627 |
| Mdm2          | 1.42381 |

|               |         |
|---------------|---------|
| H2-Q4         | 1.4234  |
| Rfng          | 1.42249 |
| Krtap4-6      | 1.41923 |
| Xdh           | 1.41488 |
| Gprc5a        | 1.41394 |
| Fam83c        | 1.4134  |
| Krtap26-1     | 1.41187 |
| Lipn          | 1.4115  |
| Cyp3a13       | 1.41101 |
| Ptges         | 1.40892 |
| B4galnt3      | 1.40624 |
| Lrrc8c        | 1.4054  |
| Ggt1          | 1.40308 |
| Krtap2-4      | 1.40183 |
| 9930013L23Rik | 1.40029 |
| Gm11563       | 1.40012 |
| Gpr56         | 1.39979 |
| Mark4         | 1.39688 |
| Slpi          | 1.39662 |
| Crip1         | 1.39629 |
| Zfp36l2       | 1.39577 |
| Serpib6a      | 1.3948  |
| Avpi1         | 1.39251 |

|               |         |
|---------------|---------|
| Slc6a6        | 1.39197 |
| Tmem2         | 1.39154 |
| Rhoc          | 1.38616 |
| Aldh3a1       | 1.38411 |
| Cyp27a1       | 1.38321 |
| Car2          | 1.38044 |
| Rptn          | 1.37905 |
| Mlf1          | 1.37852 |
| Uhrf1bp1l     | 1.37711 |
| 4930523C07Rik | 1.37696 |
| Junb          | 1.37604 |
| Wfikkn1       | 1.37417 |
| Sipa1l2       | 1.37288 |
| Eaf1          | 1.37208 |
| 1600029D21Rik | 1.371   |
| Ccdc85b       | 1.36854 |
| Rhof          | 1.36745 |
| Tgm2          | 1.36543 |
| Lysmd3        | 1.36211 |
| Dsc2          | 1.35546 |
| Sgk1          | 1.35405 |
| Wnt11         | 1.34939 |
| Fmo5          | 1.34904 |

|           |         |
|-----------|---------|
| Pglyrp3   | 1.34861 |
| Myadm     | 1.34825 |
| Zdhhc13   | 1.34719 |
| Klf13     | 1.34243 |
| Dusp26    | 1.34228 |
| Cdc42ep1  | 1.34209 |
| Pitpnc1   | 1.34062 |
| Mmp2      | 1.33731 |
| Slco1a5   | 1.33555 |
| Slc23a2   | 1.33481 |
| Eva1b     | 1.33345 |
| Sesn2     | 1.33328 |
| Carhsp1   | 1.33316 |
| Arhgef28  | 1.33212 |
| Gm11938   | 1.33187 |
| Ehd4      | 1.32967 |
| Ablim3    | 1.32644 |
| Serpinb1a | 1.32613 |
| Syt12     | 1.32508 |
| Pdpn      | 1.3249  |
| St3gal2   | 1.32189 |
| Dsg3      | 1.32186 |
| Tgm6      | 1.32053 |

|           |         |
|-----------|---------|
| Cdk18     | 1.32005 |
| Nudt22    | 1.31913 |
| Filip1l   | 1.31833 |
| Slc35d1   | 1.31763 |
| Map3k5    | 1.31655 |
| Ldlr      | 1.3158  |
| Tnfrsf4   | 1.31152 |
| Hr        | 1.30991 |
| Gatsl2    | 1.30821 |
| Bicd2     | 1.30578 |
| Krtap3-3  | 1.30361 |
| Aqp9      | 1.30141 |
| Tmem173   | 1.30122 |
| Krtap13-1 | 1.30098 |
| Nqo1      | 1.30097 |
| Dlx2      | 1.30029 |
| Id2       | 1.29954 |
| Dkk3      | 1.2985  |
| Prdx6     | 1.29801 |
| Gm11562   | 1.29725 |
| Nfkbiz    | 1.29596 |
| Acta2     | 1.29229 |
| Hagh      | 1.29077 |

|         |         |
|---------|---------|
| Abl2    | 1.288   |
| Kif26b  | 1.28744 |
| Slc6a2  | 1.28741 |
| Wdr61   | 1.28716 |
| Slc6a17 | 1.28111 |
| Stbd1   | 1.27873 |
| Fam115a | 1.27663 |
| Mgat4a  | 1.27304 |
| Nxpe4   | 1.27261 |
| Itga3   | 1.27182 |
| Ccdc68  | 1.27018 |
| Cdkn2b  | 1.26639 |
| Cgref1  | 1.2647  |
| Irf5    | 1.26368 |
| Unc45a  | 1.26365 |
| Impdh1  | 1.2622  |
| Slc5a1  | 1.25948 |
| Msrb3   | 1.25894 |
| Samd4   | 1.25782 |
| Bok     | 1.25477 |
| Tm4sf1  | 1.25461 |
| Abca1   | 1.25346 |
| Glis2   | 1.25341 |



|               |         |
|---------------|---------|
| Pi15          | 1.25214 |
| Fads3         | 1.24333 |
| Stx3          | 1.24054 |
| Mfhas1        | 1.23916 |
| Krt39         | 1.23762 |
| Krt17         | 1.23723 |
| Dzip1l        | 1.2368  |
| Spred1        | 1.23613 |
| 2310042E22Rik | 1.23415 |
| Krtap4-1      | 1.23096 |
| E130012A19Rik | 1.22811 |
| 1810037117Rik | 1.22498 |
| Arc           | 1.22271 |
| Prrg4         | 1.22198 |
| Nkd2          | 1.2189  |
| Tubb6         | 1.21813 |
| Pdzrn3        | 1.21739 |
| Dip2b         | 1.21728 |
| Smad7         | 1.2153  |
| Slc4a7        | 1.21414 |
| Fndc1         | 1.21372 |
| Plcg2         | 1.21296 |
| Cyp2j6        | 1.21237 |

|            |         |
|------------|---------|
| Pck2       | 1.21235 |
| Chka       | 1.20887 |
| Dnahc7b    | 1.20804 |
| Wnt5a      | 1.20749 |
| Pstpip2    | 1.20461 |
| Cd36       | 1.20278 |
| Rnf122     | 1.20203 |
| Ippk       | 1.19763 |
| Sdc1       | 1.19607 |
| Srxn1      | 1.19306 |
| Abcg1      | 1.1928  |
| Pvr        | 1.18696 |
| Mlph       | 1.18663 |
| Krtap19-9b | 1.18385 |
| Porcn      | 1.18273 |
| Cyp2b10    | 1.18038 |
| Cpd        | 1.17958 |
| Slc20a1    | 1.17626 |
| Ddx58      | 1.17471 |
| Abcg2      | 1.17378 |
| Mlana      | 1.16939 |
| Col6a3     | 1.1663  |
| AU018091   | 1.16454 |

|         |         |
|---------|---------|
| Efna5   | 1.16168 |
| Luzp1   | 1.15591 |
| Spry2   | 1.15516 |
| ler2    | 1.15427 |
| Dab2ip  | 1.15323 |
| Nlr1    | 1.15312 |
| Tgfbr3  | 1.15225 |
| Eva1a   | 1.1519  |
| Ece1    | 1.14944 |
| Gnb5    | 1.14737 |
| ler3    | 1.14713 |
| Trpv3   | 1.14658 |
| Msx2    | 1.14246 |
| Atp11b  | 1.13796 |
| Icam1   | 1.13793 |
| Dio2    | 1.13273 |
| Gm9696  | 1.13229 |
| Ankrd9  | 1.13053 |
| Trim16  | 1.13018 |
| Macf1   | 1.12846 |
| Tiparp  | 1.12768 |
| Plekhb2 | 1.12592 |
| Gpnmb   | 1.12521 |

|           |         |
|-----------|---------|
| Osbpl8    | 1.12488 |
| Prickle2  | 1.12472 |
| Ypel3     | 1.1246  |
| Parp8     | 1.12423 |
| Tmigd1    | 1.12377 |
| Map7d1    | 1.12265 |
| Cdk17     | 1.1209  |
| Has3      | 1.12033 |
| Slc45a3   | 1.11932 |
| Elk4      | 1.11895 |
| Fstl1     | 1.11854 |
| Zc3h12a   | 1.11778 |
| Acvr1     | 1.11561 |
| Gm15645   | 1.11449 |
| Crebrf    | 1.10545 |
| Lzts1     | 1.10518 |
| Krtap24-1 | 1.10511 |
| Atp1b3    | 1.10504 |
| Nbeal2    | 1.10449 |
| Thy1      | 1.10022 |
| Frat1     | 1.09975 |
| Ier5l     | 1.09935 |
| Itga5     | 1.09856 |

|          |         |
|----------|---------|
| Scnn1g   | 1.09806 |
| Prkce    | 1.09665 |
| Emb      | 1.0955  |
| Trib1    | 1.09391 |
| Hoxc13   | 1.09158 |
| Slc27a6  | 1.0896  |
| Tmem38a  | 1.08659 |
| Itiprip  | 1.08579 |
| Reep4    | 1.08502 |
| Tmtc3    | 1.08331 |
| Slc39a14 | 1.08314 |
| Rap1gap2 | 1.08279 |
| Ets1     | 1.08041 |
| Rassf1   | 1.08019 |
| Dock5    | 1.07604 |
| Rgs12    | 1.07532 |
| Parva    | 1.07488 |
| Smad6    | 1.07313 |
| Dusp2    | 1.07292 |
| Nr4a1    | 1.07235 |
| Ripk3    | 1.07197 |
| Fbxo33   | 1.06452 |
| Tanc2    | 1.06437 |

|               |         |
|---------------|---------|
| Bmp7          | 1.06212 |
| Ppard         | 1.0589  |
| Hmcn1         | 1.05338 |
| Igf2bp2       | 1.05247 |
| Fam84b        | 1.05245 |
| Fhl3          | 1.0517  |
| Shb           | 1.05024 |
| Atp8b1        | 1.04967 |
| Mst1r         | 1.04605 |
| 2010111101Rik | 1.04523 |
| Mpzl2         | 1.04521 |
| Pxdn          | 1.04458 |
| Tmc7          | 1.04441 |
| Slc22a15      | 1.04294 |
| Bace2         | 1.03995 |
| Crot          | 1.03985 |
| Rhob          | 1.03908 |
| Slc52a3       | 1.03903 |
| Rtkn          | 1.03786 |
| Fam101b       | 1.03757 |
| Wdr62         | 1.03701 |
| Npc1          | 1.03667 |
| Slc16a7       | 1.03636 |

|           |         |
|-----------|---------|
| Zfand2a   | 1.03593 |
| Krt25     | 1.03405 |
| lpmk      | 1.03366 |
| Pex5      | 1.02975 |
| Rgs2      | 1.02945 |
| Asap1     | 1.02938 |
| Slc7a6    | 1.02936 |
| Cldn25    | 1.02901 |
| Krtap4-2  | 1.02899 |
| Snn       | 1.02766 |
| Tle4      | 1.02567 |
| Tfap2c    | 1.02316 |
| Smpdl3b   | 1.02186 |
| Stk17b    | 1.02108 |
| Cyp4f17   | 1.02059 |
| Qpctl     | 1.0201  |
| Desi2     | 1.01973 |
| Plxnb2    | 1.01577 |
| Il1r1     | 1.01361 |
| Rerg      | 1.01326 |
| Bcl10     | 1.01297 |
| Myh14     | 1.01119 |
| Rab11fip5 | 1.0096  |

|               |          |
|---------------|----------|
| Dcbld2        | 1.00911  |
| Krtap3-1      | 1.00902  |
| Scap          | 1.00101  |
| 1700017B05Rik | 1.00028  |
| Baz1a         | 1.00008  |
| Smurf1        | 0.996752 |
| Fam198b       | 0.995526 |
| Mir22hg       | 0.994597 |
| Slc25a13      | 0.993195 |
| Pard6g        | 0.993083 |
| Csrp1         | 0.992896 |
| Rabgap1l      | 0.990751 |
| Bambi         | 0.988153 |
| Gclm          | 0.987782 |
| Zfp628        | 0.987246 |
| Dmxl2         | 0.986757 |
| Sertad4       | 0.986739 |
| Krtap17-1     | 0.986547 |
| Tbcel         | 0.986293 |
| Rnf39         | 0.984567 |
| Slc29a3       | 0.98306  |
| Itpripl2      | 0.982836 |
| Krtap6-5      | 0.982742 |



|          |          |
|----------|----------|
| Pcdh1    | 0.981664 |
| Sgms1    | 0.976917 |
| Krtap9-3 | 0.976697 |
| Pi4k2b   | 0.976566 |
| Ripk4    | 0.97542  |
| Lrp1     | 0.973369 |
| Ptgds    | 0.972862 |
| Fosb     | 0.972101 |
| Btbd3    | 0.971818 |
| Cadm1    | 0.971805 |
| Unc5b    | 0.969675 |
| Prdx1    | 0.967888 |
| Maf      | 0.967455 |
| Zdhhc18  | 0.966766 |
| Ppp2r1b  | 0.966255 |
| Arhgef4  | 0.961623 |
| Slc24a6  | 0.960468 |
| Krtap6-1 | 0.959203 |
| Tmem64   | 0.959065 |
| Gli2     | 0.958955 |
| AI661453 | 0.958241 |
| Snx25    | 0.958123 |
| Kcnj15   | 0.95582  |

|             |          |
|-------------|----------|
| Krt32       | 0.9555   |
| D16Ertd472e | 0.951249 |
| Crb3        | 0.949246 |
| Cdkn1a      | 0.948376 |
| Atp1a1      | 0.945844 |
| Mbip        | 0.9457   |
| Atp10d      | 0.945556 |
| Mybl2       | 0.945379 |
| Zc3h7a      | 0.944319 |
| Suco        | 0.943797 |
| Vldlr       | 0.940426 |
| Ptpn1       | 0.939089 |
| Kit         | 0.938418 |
| Pls3        | 0.938151 |
| Fcho2       | 0.937781 |
| Myof        | 0.937618 |
| Hbs1l       | 0.936339 |
| Fgfbp1      | 0.935074 |
| Lgr4        | 0.93505  |
| Krtap21-1   | 0.934865 |
| Dcn         | 0.932996 |
| Epha2       | 0.932886 |
| Sh3rf1      | 0.931723 |

|          |          |
|----------|----------|
| Plat     | 0.930241 |
| Il4ra    | 0.930062 |
| Ltbr     | 0.926232 |
| Arhgef3  | 0.925471 |
| Epc2     | 0.92535  |
| Slc29a1  | 0.923211 |
| Phlda3   | 0.923088 |
| Agap1    | 0.923045 |
| Aqp3     | 0.921798 |
| Dedd2    | 0.918883 |
| Cdc14a   | 0.918829 |
| Fam83h   | 0.9181   |
| Epb4.1l1 | 0.917667 |
| Trim59   | 0.917433 |
| Tpbg     | 0.917257 |
| Itpkc    | 0.916844 |
| F2r1     | 0.91521  |
| Sde2     | 0.911882 |
| Acot9    | 0.909956 |
| Rap2b    | 0.907788 |
| Klk10    | 0.907484 |
| Simap    | 0.906343 |
| Trim8    | 0.904529 |

|               |          |
|---------------|----------|
| Igsf8         | 0.904331 |
| B630005N14Rik | 0.903396 |
| Dbf4          | 0.902527 |
| Cecr2         | 0.898856 |
| Mgst1         | 0.898249 |
| Lrp12         | 0.895952 |
| Cmip          | 0.895203 |
| Sfrp1         | 0.895083 |
| Slc35f6       | 0.894582 |
| Lamp2         | 0.890839 |
| Fxyd3         | 0.89068  |
| Adrb2         | 0.888467 |
| Axin1         | 0.886178 |
| Pkp4          | 0.885053 |
| Krt28         | 0.884365 |
| Phf17         | 0.883964 |
| Krtap14       | 0.883657 |
| Cntfr         | 0.881021 |
| Rab24         | 0.878543 |
| Ralb          | 0.876473 |
| Cebpa         | 0.875133 |
| Ppp1r15a      | 0.874854 |
| Klk9          | 0.874206 |

|               |          |
|---------------|----------|
| Eif6          | 0.871574 |
| Fam199x       | 0.871001 |
| Zwint         | 0.868544 |
| Gclc          | 0.866289 |
| Dct           | 0.866087 |
| Msn           | 0.865636 |
| Vegfa         | 0.864127 |
| Klc3          | 0.863842 |
| 2810474O19Rik | 0.862965 |
| Larp1b        | 0.862716 |
| Fam83g        | 0.862204 |
| Irx3          | 0.861486 |
| Calm5         | 0.85836  |
| Irf6          | 0.858101 |
| Enah          | 0.855839 |
| Pxn           | 0.855626 |
| Dusp8         | 0.849401 |
| Krt34         | 0.849038 |
| Bmp2          | 0.848544 |
| Sik3          | 0.847972 |
| Serinc5       | 0.847703 |
| Cyp2s1        | 0.847048 |
| Naa25         | 0.846978 |

|          |          |
|----------|----------|
| Hopx     | 0.846019 |
| Siah1a   | 0.845494 |
| Jhdm1d   | 0.843594 |
| Sdcbp    | 0.840872 |
| Gba      | 0.839525 |
| Fzd6     | 0.839184 |
| Gprc5d   | 0.838987 |
| Zfp703   | 0.834523 |
| Cux1     | 0.833682 |
| Arap2    | 0.832248 |
| Lyg2     | 0.832022 |
| Bckdha   | 0.831184 |
| Erf      | 0.829433 |
| Abhd6    | 0.827552 |
| Pgap1    | 0.826345 |
| Mtx1     | 0.825712 |
| Lrrfip1  | 0.822767 |
| Prpf18   | 0.82042  |
| Arhgap21 | 0.818611 |
| Pvr1     | 0.817981 |
| Med13l   | 0.810825 |
| Usp31    | 0.810029 |
| Ppm1a    | 0.802305 |

|          |           |
|----------|-----------|
| Diap1    | 0.795517  |
| Pim3     | 0.794165  |
| Stat3    | 0.788771  |
| Palmd    | 0.787299  |
| Tatdn2   | 0.784234  |
| Plch2    | 0.781712  |
| Rap2c    | 0.772541  |
| Kremen1  | 0.74724   |
| Stard7   | -0.76221  |
| Col7a1   | -0.774389 |
| Golgb1   | -0.789291 |
| Cul5     | -0.789681 |
| Rab3d    | -0.794391 |
| Slc25a11 | -0.797195 |
| Acat1    | -0.798428 |
| Efha1    | -0.805018 |
| Arhgef5  | -0.805549 |
| Col4a5   | -0.807824 |
| Cds1     | -0.808845 |
| Ttc7     | -0.808911 |
| Sdr9c7   | -0.809469 |
| Arrdc3   | -0.816937 |
| Myo5b    | -0.817148 |

|               |           |
|---------------|-----------|
| Oas1f         | -0.817822 |
| Rab5a         | -0.817961 |
| Usp46         | -0.818569 |
| Trove2        | -0.820582 |
| Mtus1         | -0.820899 |
| Sytl1         | -0.821002 |
| Sp6           | -0.82178  |
| Ppp1r13b      | -0.824125 |
| Arhgef10l     | -0.830657 |
| Rmnd5a        | -0.830817 |
| Cbx6          | -0.831655 |
| Pik3c2a       | -0.831912 |
| Tbc1d14       | -0.832489 |
| Scel          | -0.832967 |
| Lars2         | -0.833403 |
| Npnt          | -0.834704 |
| Mvd           | -0.837509 |
| Apcdd1        | -0.838285 |
| AA986860      | -0.840188 |
| Rab11fip1     | -0.840331 |
| Atg9b         | -0.842166 |
| 1700021K19Rik | -0.842575 |
| Tmem86a       | -0.848136 |



|               |           |
|---------------|-----------|
| Bscl2         | -0.849171 |
| Tgfb3         | -0.85359  |
| Pou2f3        | -0.856553 |
| Fam89a        | -0.857458 |
| Ube2e2        | -0.858648 |
| Mpp7          | -0.85868  |
| Rora          | -0.86248  |
| Spire1        | -0.862859 |
| Xrcc6         | -0.865119 |
| Ltbp1         | -0.867175 |
| C330005M16Rik | -0.867579 |
| Inpp5b        | -0.867847 |
| Tec           | -0.869357 |
| 2310022B05Rik | -0.8697   |
| Lgals9        | -0.870497 |
| Insig2        | -0.873246 |
| Dnase1l2      | -0.878277 |
| 0610007P14Rik | -0.878591 |
| Utp11l        | -0.878669 |
| Lce1i         | -0.878867 |
| Cbx4          | -0.879282 |
| Epb4.1        | -0.880233 |
| Lipe          | -0.883395 |

|               |           |
|---------------|-----------|
| Tmem135       | -0.884704 |
| Asah2         | -0.885735 |
| Zkscan8       | -0.886124 |
| Ap1s3         | -0.886842 |
| Evi5          | -0.888029 |
| 2310007B03Rik | -0.888062 |
| Rhou          | -0.889218 |
| Sphk2         | -0.893913 |
| Hook3         | -0.89501  |
| Gpr115        | -0.896233 |
| Megf6         | -0.896575 |
| Snap47        | -0.89758  |
| Pcyt1a        | -0.89814  |
| Ttk           | -0.898252 |
| Gabarapl1     | -0.898474 |
| Il22ra1       | -0.900086 |
| Ept1          | -0.901095 |
| Pik3r1        | -0.903635 |
| Trappc1       | -0.907774 |
| Pfkfb4        | -0.907905 |
| Aldh3b2       | -0.908409 |
| Wnk2          | -0.90899  |
| Hmgcl         | -0.909761 |

|         |           |
|---------|-----------|
| Lce1f   | -0.913001 |
| Ift20   | -0.914632 |
| 8-Sep   | -0.914802 |
| Rgma    | -0.915144 |
| Liph    | -0.916549 |
| Fa2h    | -0.916662 |
| Tpra1   | -0.919599 |
| Fndc9   | -0.922398 |
| Nnt     | -0.927479 |
| Eif4h   | -0.929001 |
| Daam1   | -0.929778 |
| Sorbs1  | -0.930128 |
| Rassf5  | -0.93016  |
| Rb1cc1  | -0.930182 |
| Ii10rb  | -0.933466 |
| Gm16515 | -0.934431 |
| Elovl6  | -0.936606 |
| Mlec    | -0.938189 |
| Btbd2   | -0.93871  |
| Nupr1   | -0.941322 |
| Wdr45   | -0.944383 |
| Sec62   | -0.944836 |
| Heph    | -0.944941 |

|               |           |
|---------------|-----------|
| Rasa3         | -0.947135 |
| Ldlrad3       | -0.947234 |
| Fam110a       | -0.9474   |
| 4933426M11Rik | -0.948252 |
| Capn6         | -0.949472 |
| Tef           | -0.950072 |
| Abhd12b       | -0.950728 |
| Mocs2         | -0.9514   |
| Adam15        | -0.95329  |
| Tmem154       | -0.954256 |
| Anp32a        | -0.955448 |
| Rcbtb2        | -0.956111 |
| Ddhd1         | -0.957022 |
| BC016579      | -0.958266 |
| Arap1         | -0.959631 |
| Blnk          | -0.960113 |
| Tmsb4x        | -0.961829 |
| 4833423E24Rik | -0.96199  |
| Pdgfc         | -0.965733 |
| Espl1         | -0.966767 |
| Ascc2         | -0.969083 |
| Abcd3         | -0.970767 |
| Ptprz1        | -0.971029 |

|          |           |
|----------|-----------|
| Slc27a4  | -0.973491 |
| Magi3    | -0.97517  |
| Lipg     | -0.976326 |
| Nccrp1   | -0.978112 |
| Rnf170   | -0.978308 |
| Pdzd11   | -0.978775 |
| Tsc22d2  | -0.979764 |
| Decr2    | -0.980029 |
| Tnfrsf19 | -0.981883 |
| Timm10b  | -0.983443 |
| Hmgn2    | -0.983927 |
| Ly6g6e   | -0.983984 |
| Rorc     | -0.984856 |
| Smtnl2   | -0.984959 |
| Hsd11    | -0.985215 |
| Mmab     | -0.986752 |
| Heatr6   | -0.986837 |
| Mterfd2  | -0.988397 |
| Vezt     | -0.989071 |
| Mast3    | -0.989221 |
| Hibch    | -0.992119 |
| Tuba8    | -0.993608 |
| Sort1    | -0.997714 |

|               |           |
|---------------|-----------|
| Qsox2         | -0.998175 |
| 6720456H2ORik | -0.99989  |
| Pcmttd1       | -1.00047  |
| Id4           | -1.00121  |
| Prrc1         | -1.00538  |
| Arhgap30      | -1.00556  |
| Gas1          | -1.00569  |
| Efna3         | -1.0067   |
| Ccdc91        | -1.00762  |
| Gnptab        | -1.0081   |
| Mt4           | -1.00871  |
| Mdga1         | -1.00945  |
| Gjb3          | -1.01131  |
| Spag1         | -1.01337  |
| Cybasc3       | -1.01534  |
| Yif1b         | -1.01621  |
| Lrch1         | -1.01692  |
| Hdac11        | -1.01741  |
| Snapc5        | -1.01772  |
| Bbox1         | -1.0211   |
| Klhl8         | -1.02115  |
| Rab8b         | -1.02181  |
| Ssfa2         | -1.02248  |

|         |          |
|---------|----------|
| Spsb3   | -1.02281 |
| Extl1   | -1.02314 |
| Apoa1bp | -1.02374 |
| Stk4    | -1.02393 |
| Itpr2   | -1.02439 |
| Dlg3    | -1.02601 |
| Nacc2   | -1.02737 |
| Il1f8   | -1.03023 |
| Itm2b   | -1.03271 |
| Lman2l  | -1.03288 |
| Edar    | -1.03635 |
| Barx2   | -1.03839 |
| Vgll3   | -1.03943 |
| Narg2   | -1.04038 |
| Acs11   | -1.04056 |
| Usp38   | -1.04208 |
| Hn1     | -1.0429  |
| Ptdss2  | -1.04429 |
| Pccb    | -1.04489 |
| Prss23  | -1.04809 |
| Pdgfb   | -1.04974 |
| Pstk    | -1.05039 |
| Ttc30b  | -1.0507  |

|               |          |
|---------------|----------|
| Zfp120        | -1.05089 |
| Nfatc2        | -1.05106 |
| Rogdi         | -1.05499 |
| Parp1         | -1.05527 |
| Gltpd1        | -1.05672 |
| Pxmp4         | -1.05694 |
| Scrn2         | -1.05937 |
| Fig4          | -1.06002 |
| Stard4        | -1.06036 |
| Pak3          | -1.06036 |
| Pou6f1        | -1.06091 |
| Clca1         | -1.06276 |
| Glb1l2        | -1.06281 |
| Samd8         | -1.06316 |
| 2310044G17Rik | -1.06591 |
| Satb1         | -1.06775 |
| Eps8l2        | -1.07013 |
| Krba1         | -1.07016 |
| Chst15        | -1.07075 |
| Cgn1          | -1.07221 |
| Klhl25        | -1.07279 |
| Acadm         | -1.07451 |
| Dhcr7         | -1.07661 |



|               |          |
|---------------|----------|
| Hebp2         | -1.07671 |
| Mme           | -1.07803 |
| Etv6          | -1.0785  |
| Tti1          | -1.07976 |
| Mthfr         | -1.08056 |
| Soat1         | -1.08213 |
| Csnk1e        | -1.08268 |
| Stat5a        | -1.08827 |
| Spice1        | -1.08911 |
| Ubl3          | -1.0914  |
| Fam57a        | -1.09145 |
| Stra13        | -1.09368 |
| Idh2          | -1.09534 |
| Tnnt2         | -1.10092 |
| Plcx1         | -1.1011  |
| 2310014L17Rik | -1.1013  |
| Anxa6         | -1.10384 |
| Ctsa          | -1.10727 |
| Ptpn6         | -1.10771 |
| Lypd5         | -1.10888 |
| Myzap         | -1.10897 |
| Mdfic         | -1.10937 |
| Lce1g         | -1.11121 |

|        |          |
|--------|----------|
| Mgarp  | -1.11138 |
| Pycard | -1.11141 |
| Aldoc  | -1.113   |
| Eif2c4 | -1.11693 |
| Desi1  | -1.11792 |
| Kif26a | -1.11857 |
| Ttpa   | -1.1202  |
| Tbc1d7 | -1.12038 |
| Rnf11  | -1.12064 |
| Nebl   | -1.12078 |
| Fancg  | -1.12254 |
| Sorbs3 | -1.12618 |
| Atxn10 | -1.12726 |
| Psapl1 | -1.12743 |
| Zfp41  | -1.13383 |
| Clybl  | -1.13438 |
| Hdac10 | -1.13447 |
| Lrp4   | -1.13956 |
| Pdk1   | -1.15036 |
| Nuak1  | -1.15057 |
| Cmtm8  | -1.15059 |
| Fam64a | -1.15176 |
| Dgat2  | -1.1532  |

|          |          |
|----------|----------|
| BC029214 | -1.15405 |
| Pex10    | -1.15593 |
| Fam73b   | -1.15672 |
| Fbxo6    | -1.15737 |
| Il1f9    | -1.16091 |
| Cbs      | -1.16603 |
| Srl      | -1.16636 |
| Sema3b   | -1.16652 |
| Aim1l    | -1.17104 |
| Hist1h1c | -1.17335 |
| Lmbr1l   | -1.17415 |
| Inpp5d   | -1.17699 |
| Hint3    | -1.17728 |
| Neat1    | -1.1778  |
| Rdh13    | -1.17789 |
| Cyp2g1   | -1.17967 |
| Slc35d2  | -1.18008 |
| Pla2g2f  | -1.18084 |
| Acacb    | -1.18207 |
| Appl2    | -1.18773 |
| Fancb    | -1.18868 |
| Crebl2   | -1.18881 |
| Bcs1l    | -1.19006 |

|               |          |
|---------------|----------|
| Chmp4c        | -1.1905  |
| Numbl         | -1.19174 |
| Tgfbi         | -1.19293 |
| Hlcs          | -1.19365 |
| Rnf5          | -1.19414 |
| Alox12        | -1.1942  |
| Mmaa          | -1.1991  |
| Tmcc3         | -1.19986 |
| Ppap2a        | -1.20023 |
| Usp2          | -1.20076 |
| Gpam          | -1.20237 |
| Lin9          | -1.20355 |
| Hist3h2a      | -1.20371 |
| Alkbh6        | -1.20512 |
| Slc6a19       | -1.20685 |
| 1110057K04Rik | -1.20722 |
| Cnm4          | -1.2089  |
| Crabp2        | -1.2126  |
| Nceh1         | -1.21484 |
| Dnajb5        | -1.21793 |
| Gadd45a       | -1.22226 |
| Mrpl14        | -1.22276 |
| Fert2         | -1.22292 |

|               |          |
|---------------|----------|
| Scpep1        | -1.22352 |
| Ggct          | -1.22781 |
| Tmem45b       | -1.22918 |
| Mycn          | -1.23071 |
| Dexi          | -1.2312  |
| Golga1        | -1.2315  |
| Tmem56        | -1.23344 |
| 4930455F23Rik | -1.23368 |
| Acox3         | -1.23412 |
| Taok1         | -1.23704 |
| Tmem177       | -1.23782 |
| Zfp60         | -1.2393  |
| Camk1d        | -1.24163 |
| 9530082P21Rik | -1.24441 |
| Hoxd8         | -1.24793 |
| 2610008E11Rik | -1.24805 |
| Arhgef37      | -1.24946 |
| Rab4a         | -1.25284 |
| Ano10         | -1.25416 |
| Cdr2          | -1.25709 |
| Bag2          | -1.25798 |
| Aga           | -1.25836 |
| Slc38a3       | -1.25843 |

|          |          |
|----------|----------|
| Pdzk1ip1 | -1.25932 |
| Ankrd13c | -1.26276 |
| Otub2    | -1.26391 |
| Tmem106c | -1.26593 |
| Fam111a  | -1.26701 |
| Gale     | -1.2679  |
| Hoxa2    | -1.26958 |
| Agpat4   | -1.27155 |
| Scml2    | -1.27275 |
| Sdcbp2   | -1.27288 |
| Tnfaip2  | -1.27448 |
| Phkb     | -1.27818 |
| Asprv1   | -1.2805  |
| Tsc22d3  | -1.28063 |
| Cacna2d2 | -1.28071 |
| Trib3    | -1.28106 |
| Mmgt2    | -1.28505 |
| Smpd3    | -1.28651 |
| Blvrb    | -1.28688 |
| Amotl2   | -1.28737 |
| Gng12    | -1.28854 |
| Tmem189  | -1.28923 |
| Rusc2    | -1.2911  |

|          |          |
|----------|----------|
| Traf6    | -1.2912  |
| Orm1     | -1.29153 |
| Zfp667   | -1.29485 |
| Slc16a14 | -1.29593 |
| Asah1    | -1.29812 |
| Tsga14   | -1.29879 |
| Gdpd2    | -1.2991  |
| Hoxa1    | -1.29923 |
| Slc11a2  | -1.29935 |
| Nmnat2   | -1.29989 |
| Trappc2  | -1.30007 |
| Zkscan7  | -1.30034 |
| Csf1     | -1.30067 |
| Ampd3    | -1.30073 |
| Sh3rf2   | -1.30075 |
| Trim72   | -1.30087 |
| Morn4    | -1.30154 |
| Ncf1     | -1.30173 |
| Aloxe3   | -1.30245 |
| Klhl23   | -1.30311 |
| Tbc1d16  | -1.30332 |
| 3-Mar    | -1.30422 |
| Fuca1    | -1.30651 |

|               |          |
|---------------|----------|
| Dennd1b       | -1.30913 |
| Pafah2        | -1.3096  |
| Lca5          | -1.3101  |
| Paqr8         | -1.31044 |
| Rps6ka6       | -1.31045 |
| Mospd2        | -1.31061 |
| Rnf103        | -1.31065 |
| 4932415G12Rik | -1.31071 |
| Casp14        | -1.31304 |
| Triobp        | -1.31339 |
| Pdcd4         | -1.31375 |
| Alox12e       | -1.31552 |
| Sdf2l1        | -1.31584 |
| Gfod2         | -1.31739 |
| Ubt1          | -1.31881 |
| Rgmb          | -1.31943 |
| AW146154      | -1.32064 |
| Zdhhc15       | -1.32235 |
| Slc15a1       | -1.32266 |
| Atp13a4       | -1.32328 |
| Neu2          | -1.32679 |
| Cln8          | -1.33634 |
| Lmo7          | -1.3383  |



|               |          |
|---------------|----------|
| Paqr5         | -1.33842 |
| 4930444A02Rik | -1.33867 |
| Gpld1         | -1.34011 |
| Ncam1         | -1.34343 |
| Alad          | -1.34448 |
| Pls1          | -1.34459 |
| Dock4         | -1.34479 |
| Man1c1        | -1.3468  |
| Nme4          | -1.34759 |
| Zfp706        | -1.35237 |
| Nudt1         | -1.3547  |
| Add3          | -1.35702 |
| Gm2a          | -1.35797 |
| Sgpl1         | -1.35844 |
| Lgals12       | -1.36313 |
| Sfxn5         | -1.36555 |
| Unc13b        | -1.36645 |
| Lptm5         | -1.36738 |
| Lce1e         | -1.36824 |
| Akap7         | -1.36939 |
| Uros          | -1.36942 |
| Slc26a2       | -1.3695  |
| Rbbp8nl       | -1.3751  |

|               |          |
|---------------|----------|
| Tmem141       | -1.37887 |
| Cdkn2c        | -1.38169 |
| Gm14137       | -1.38432 |
| Hyal4         | -1.38887 |
| 2810408A11Rik | -1.39042 |
| Slc22a18      | -1.39193 |
| Gabarapl2     | -1.39693 |
| Col14a1       | -1.39793 |
| Nt5c2         | -1.40227 |
| Pik3c2b       | -1.40253 |
| Bahd1         | -1.40653 |
| Serpina9      | -1.40756 |
| Gemin4        | -1.40815 |
| Selplg        | -1.41041 |
| Cotl1         | -1.41103 |
| Gpr157        | -1.41124 |
| Mfsd12        | -1.41381 |
| Smpdl3a       | -1.41426 |
| Nckap1l       | -1.41506 |
| Nrtn          | -1.41616 |
| Dock10        | -1.41745 |
| Mcf2l         | -1.41969 |
| Sgpp1         | -1.42188 |

|         |          |
|---------|----------|
| Asap3   | -1.42395 |
| Cabyr   | -1.427   |
| Cd55    | -1.42889 |
| Gm13178 | -1.43205 |
| Tex264  | -1.43268 |
| Solh    | -1.4374  |
| Nynrin  | -1.43795 |
| Tppp    | -1.43831 |
| Hebp1   | -1.44066 |
| Irs1    | -1.44444 |
| Gpc3    | -1.44461 |
| Akr1e1  | -1.44541 |
| Gsdmc   | -1.44789 |
| Chid1   | -1.44907 |
| Cd53    | -1.45209 |
| Arl4d   | -1.45316 |
| Dok3    | -1.45326 |
| Dlg2    | -1.45343 |
| Il1rn   | -1.4564  |
| Arhgef6 | -1.45984 |
| Cnst    | -1.46005 |
| Xist    | -1.46186 |
| Tor3a   | -1.46213 |

|          |          |
|----------|----------|
| Pcbd2    | -1.47031 |
| Pex13    | -1.47044 |
| Vcan     | -1.47426 |
| Sh3bgrl2 | -1.4774  |
| Ces2g    | -1.47776 |
| Antxr1   | -1.48047 |
| Ccdc3    | -1.48158 |
| Adtrp    | -1.48346 |
| Tmprss4  | -1.48661 |
| Map2     | -1.48788 |
| Dock2    | -1.48819 |
| Ankrd27  | -1.49143 |
| Laptm4b  | -1.49312 |
| Dgcr6    | -1.49617 |
| Gsn      | -1.49854 |
| Map9     | -1.49932 |
| Kctd5    | -1.50045 |
| Rassf7   | -1.50642 |
| Tex2     | -1.50784 |
| Gtdc2    | -1.50863 |
| Ivd      | -1.50884 |
| Cacnb1   | -1.51262 |
| Ranbp6   | -1.51265 |

|               |          |
|---------------|----------|
| Bckdhb        | -1.51495 |
| 2010107G23Rik | -1.51499 |
| Dpep2         | -1.51671 |
| Mgst2         | -1.51834 |
| Adamts17      | -1.51895 |
| Cntnap1       | -1.52156 |
| Reep1         | -1.52488 |
| Atp6v1b1      | -1.52506 |
| Pygl          | -1.52681 |
| Sirt5         | -1.52698 |
| Glrx          | -1.52817 |
| Gba2          | -1.52854 |
| Eef2k         | -1.53238 |
| Cdon          | -1.53304 |
| Hcls1         | -1.53474 |
| Pdyp          | -1.53601 |
| Esyt3         | -1.53736 |
| Lce1h         | -1.53773 |
| Vav1          | -1.53944 |
| Hemk1         | -1.54053 |
| Zfp759        | -1.541   |
| Lsp1          | -1.54223 |
| Gcat          | -1.5462  |

|          |          |
|----------|----------|
| Mettl7a1 | -1.54712 |
| Pdlim2   | -1.54952 |
| Ces2e    | -1.55421 |
| Coq4     | -1.55522 |
| Chst3    | -1.55556 |
| Pstpip1  | -1.55908 |
| Gna14    | -1.56021 |
| Poli     | -1.56442 |
| Neurl3   | -1.56476 |
| Smpd1    | -1.56643 |
| Paqr4    | -1.56967 |
| Sfpi1    | -1.5755  |
| Ilvbl    | -1.5762  |
| Egln3    | -1.57717 |
| Ankrd6   | -1.57749 |
| Slc25a43 | -1.57977 |
| Lce1c    | -1.58253 |
| Krt77    | -1.58393 |
| Tmcc1    | -1.58572 |
| Adamts19 | -1.58609 |
| Micu1    | -1.58932 |
| Ptprc    | -1.58985 |
| Atp5s    | -1.59103 |

|          |          |
|----------|----------|
| P4ha2    | -1.59193 |
| Epas1    | -1.59284 |
| Sh3kbp1  | -1.59355 |
| Cited2   | -1.59407 |
| Slc35e4  | -1.59687 |
| Tyrobp   | -1.60353 |
| Gstm4    | -1.60702 |
| Gsg1l    | -1.60824 |
| Nipal1   | -1.60983 |
| Bphl     | -1.61354 |
| Ormdl1   | -1.6142  |
| Igfbp5   | -1.61649 |
| Elmod1   | -1.62145 |
| Traf5    | -1.6247  |
| Hist1h1d | -1.62541 |
| Lrrn3    | -1.62862 |
| Ankrd37  | -1.62872 |
| Nr2f2    | -1.62904 |
| Atp6v0e2 | -1.63351 |
| Serpib3c | -1.63411 |
| Kif9     | -1.63478 |
| Pigg     | -1.6359  |
| Tuft1    | -1.63883 |

|         |          |
|---------|----------|
| Fam214a | -1.63889 |
| Gpcpd1  | -1.6402  |
| Zfand6  | -1.64148 |
| Kprp    | -1.64157 |
| Tfcp2   | -1.64548 |
| Sphk1   | -1.64653 |
| Acap1   | -1.65236 |
| Acer1   | -1.65245 |
| Sema3a  | -1.65385 |
| Il18    | -1.65459 |
| Mn1     | -1.65687 |
| Itgam   | -1.66018 |
| Mocos   | -1.66648 |
| Tmem119 | -1.67221 |
| Lonp2   | -1.67522 |
| Naga    | -1.67806 |
| Pm20d2  | -1.68105 |
| Csta    | -1.68373 |
| Wnk4    | -1.68479 |
| Fut2    | -1.68654 |
| Fcamr   | -1.68775 |
| Krt7    | -1.68785 |
| Arsb    | -1.69265 |



|               |          |
|---------------|----------|
| Scd2          | -1.69611 |
| Apbb1ip       | -1.70182 |
| Ctnnbip1      | -1.70357 |
| Elovl1        | -1.70973 |
| Lyst          | -1.7101  |
| Lce1d         | -1.71068 |
| Scara3        | -1.71129 |
| Tead4         | -1.71202 |
| 4931428F04Rik | -1.71299 |
| Gjb5          | -1.71482 |
| Coro1a        | -1.72786 |
| Ptprm         | -1.73183 |
| Avil          | -1.73282 |
| Col27a1       | -1.73304 |
| Akap17b       | -1.73911 |
| Ttll11        | -1.73911 |
| Tlr2          | -1.73985 |
| Ttc30a1       | -1.74355 |
| Sema3d        | -1.74455 |
| Hiatl1        | -1.74473 |
| Hsd17b2       | -1.74661 |
| Eps8l1        | -1.74732 |
| Mfsd7c        | -1.75086 |

|         |          |
|---------|----------|
| Clca2   | -1.75135 |
| Ncf4    | -1.75314 |
| Camk1   | -1.75402 |
| Ccr1    | -1.75463 |
| Slc37a2 | -1.76108 |
| Kcnj2   | -1.76154 |
| Itgax   | -1.76163 |
| Srgap2  | -1.76318 |
| Krt23   | -1.76386 |
| Slc46a3 | -1.77021 |
| Mapk13  | -1.77216 |
| Gldc    | -1.78062 |
| Nfam1   | -1.78398 |
| Pcsk2   | -1.78705 |
| Csf1r   | -1.78855 |
| Myo1f   | -1.79017 |
| Rdh9    | -1.79122 |
| Fam3b   | -1.79293 |
| Zfp438  | -1.79524 |
| Napsa   | -1.79557 |
| Skint6  | -1.79619 |
| Wnt16   | -1.79811 |
| Thns1   | -1.80069 |

|         |          |
|---------|----------|
| Slc1a3  | -1.80217 |
| Sdr42e1 | -1.81193 |
| Ccdc164 | -1.81233 |
| C2cd2   | -1.81378 |
| Fras1   | -1.81566 |
| Rnd1    | -1.81621 |
| Per3    | -1.81707 |
| Frem2   | -1.82332 |
| Plekha2 | -1.82363 |
| H60c    | -1.82385 |
| Camkk1  | -1.82452 |
| Agpat9  | -1.82647 |
| Fam213b | -1.82664 |
| Tmem35  | -1.83496 |
| Fam25c  | -1.83585 |
| Abca3   | -1.83757 |
| Fmnl1   | -1.83934 |
| Nrep    | -1.83957 |
| Coro6   | -1.84209 |
| Ypel2   | -1.84576 |
| Gm11992 | -1.84754 |
| Slc4a9  | -1.85073 |
| Svip    | -1.86021 |

|               |              |
|---------------|--------------|
| Rab40b        | -1.86373     |
| Bcmo1         | -1.86891     |
| Kank4         | -1.87134     |
| Pon3          | -1.87297     |
| H2-DMa        | -1.87297     |
| Gpt           | -1.87401     |
| Tmem95        | -1.8747      |
| Ngef          | -1.87704     |
| Txnrd1        | -1.87807     |
| Thop1         | -1.87907     |
| Tmem231       | -1.8802      |
| 2310002D06Rik | -1.884863579 |
| Dusp13        | -1.89048     |
| Efemp1        | -1.89234     |
| H2-Eb1        | -1.89571     |
| H2-DMb2       | -1.89638     |
| Vipr1         | -1.89742     |
| Gal3st1       | -1.90488     |
| Fcgbp         | -1.90607     |
| Cryl1         | -1.90759     |
| Zbtb3         | -1.90887     |
| Rdh1          | -1.90981     |
| Rab44         | -1.9099      |

|               |          |
|---------------|----------|
| Unc13a        | -1.91318 |
| Fhit          | -1.91413 |
| Npbwr1        | -1.91706 |
| Gsta2         | -1.92146 |
| Prkcb         | -1.92549 |
| Mgmt          | -1.92672 |
| 8-Mar         | -1.93147 |
| Them5         | -1.9317  |
| Zdhhc9        | -1.93484 |
| Ddah2         | -1.93547 |
| Arrdc2        | -1.93706 |
| Sdr16c5       | -1.94112 |
| Myo1g         | -1.94144 |
| Miat          | -1.9445  |
| Arvcf         | -1.94862 |
| Lrrn1         | -1.95463 |
| 2310001H17Rik | -1.95491 |
| Prob1         | -1.95866 |
| Xkrx          | -1.95991 |
| Ptgs1         | -1.9639  |
| Spn           | -1.96481 |
| Edn2          | -1.96606 |
| Hdhd3         | -1.97744 |

|            |              |
|------------|--------------|
| Kctd4      | -1.98113     |
| Msrb2      | -1.99076     |
| Tmem229b   | -1.992       |
| Rhox10     | -1.99298     |
| Lat2       | -1.99906     |
| Glcci1     | -2.00424     |
| Ifi30      | -2.00625     |
| Acpp       | -2.01101     |
| Rgs11      | -2.01192     |
| Lynx1      | -2.01628     |
| Skint7     | -2.0183      |
| Gan        | -2.02028     |
| Guk1       | -2.02164     |
| D3Ertd751e | -2.02378     |
| Lipk       | -2.03448     |
| Aox3l1     | -2.03506     |
| Fam83e     | -2.03717     |
| Smcp2      | -2.04702     |
| Pdlim4     | -2.04831     |
| Amz1       | -2.04839     |
| Serpib13   | -2.04909     |
| BC048671   | -2.050034944 |
| Yod1       | -2.0525      |

|           |          |
|-----------|----------|
| Mafa      | -2.06016 |
| Synm      | -2.06063 |
| Nrd1      | -2.07018 |
| Lym9      | -2.07972 |
| Senp8     | -2.08185 |
| Fut1      | -2.08342 |
| BC021767  | -2.08841 |
| Was       | -2.08891 |
| Prss35    | -2.09606 |
| Anxa9     | -2.09662 |
| Lce1l     | -2.09731 |
| 1-Mar     | -2.09739 |
| Il1a      | -2.09827 |
| Ankrd55   | -2.10269 |
| Rinl      | -2.10358 |
| Atp8a1    | -2.10743 |
| Fn3krp    | -2.11116 |
| Ephx2     | -2.11479 |
| Plekha4   | -2.11939 |
| Grb14     | -2.12115 |
| Tmprss11f | -2.12147 |
| Kcnq4     | -2.12186 |
| Rragd     | -2.12223 |

|               |          |
|---------------|----------|
| Cd74          | -2.124   |
| Klf12         | -2.12446 |
| Vstm5         | -2.12629 |
| Mfsd7a        | -2.12712 |
| H2-Aa         | -2.12836 |
| Pik3c2g       | -2.12917 |
| Krt78         | -2.14169 |
| Npl           | -2.14448 |
| Kremen2       | -2.15143 |
| Ccr2          | -2.15549 |
| Prss8         | -2.15641 |
| Slc45a4       | -2.15778 |
| Ccdc69        | -2.16033 |
| Clec4a1       | -2.1621  |
| Fam83d        | -2.16243 |
| 3300005D01Rik | -2.16892 |
| 2310002J15Rik | -2.17011 |
| Csnk2a2       | -2.17291 |
| Fgd3          | -2.173   |
| Grp           | -2.18093 |
| Mad2l2        | -2.1828  |
| Clca3         | -2.18521 |
| Plagl1        | -2.18573 |



|               |          |
|---------------|----------|
| Alox5ap       | -2.18593 |
| Arhgap40      | -2.18745 |
| Cntn1         | -2.20158 |
| Il15          | -2.2027  |
| Tmem180       | -2.20349 |
| Nckip5d       | -2.20473 |
| Slc22a4       | -2.20842 |
| Ptgr1         | -2.22698 |
| Il1f5         | -2.22734 |
| Hck           | -2.23364 |
| Ptpro         | -2.2343  |
| Wfdc5         | -2.2347  |
| A430035B10Rik | -2.23796 |
| Unc93a        | -2.24775 |
| Spns2         | -2.24887 |
| Tbc1d24       | -2.25772 |
| Abhd14b       | -2.25784 |
| H2-Ab1        | -2.2581  |
| Slc28a3       | -2.2644  |
| Arg1          | -2.26636 |
| Crtac1        | -2.26849 |
| Lpo           | -2.26934 |
| Bai2          | -2.26979 |

|               |          |
|---------------|----------|
| Nt5c3         | -2.27779 |
| Ikzf2         | -2.27817 |
| 1700055N04Rik | -2.28083 |
| Chst2         | -2.29021 |
| Mansc1        | -2.29402 |
| Gchfr         | -2.29982 |
| Sybu          | -2.30645 |
| Dach2         | -2.3093  |
| Pepd          | -2.31047 |
| Cyp11a1       | -2.31548 |
| Ces2f         | -2.31941 |
| Ptpn21        | -2.31966 |
| Slc39a2       | -2.33126 |
| Postn         | -2.3315  |
| Gas7          | -2.3371  |
| A030009H04Rik | -2.34156 |
| H19           | -2.34301 |
| Fxyd6         | -2.34884 |
| Kcnj12        | -2.35193 |
| Dpysl3        | -2.35458 |
| Lce1a2        | -2.35628 |
| Plb1          | -2.36235 |
| Acpl2         | -2.36296 |

|               |          |
|---------------|----------|
| Wdr86         | -2.36602 |
| Krt15         | -2.36899 |
| Fam134b       | -2.37696 |
| Selenbp1      | -2.37698 |
| Aox4          | -2.38479 |
| Ciita         | -2.39262 |
| Gpr141        | -2.39277 |
| Pcsk6         | -2.3957  |
| Clic3         | -2.39615 |
| Foxi3         | -2.39862 |
| Scgb1a1       | -2.40255 |
| Lce1a1        | -2.4029  |
| 9930012K11Rik | -2.40554 |
| Limch1        | -2.40883 |
| Fam65c        | -2.41001 |
| Osbpl1a       | -2.41035 |
| Sned1         | -2.41395 |
| Al197445      | -2.43405 |
| Ildr2         | -2.44137 |
| Kcnj16        | -2.44147 |
| Ror1          | -2.44238 |
| Comp          | -2.44933 |
| Ppp1r3b       | -2.4523  |

|               |          |
|---------------|----------|
| Cd244         | -2.4573  |
| Nyx           | -2.46188 |
| Itgb1bp2      | -2.4731  |
| Skint5        | -2.48068 |
| Gprin2        | -2.48223 |
| Ggh           | -2.48812 |
| Prodh         | -2.49585 |
| H2-DMb1       | -2.49965 |
| Fchsd2        | -2.51825 |
| Slc46a2       | -2.52556 |
| Tjp3          | -2.52656 |
| AA414768      | -2.53089 |
| Asb2          | -2.53686 |
| Baiap2l2      | -2.53743 |
| Lrrc28        | -2.54047 |
| Engase        | -2.54129 |
| Cgn           | -2.54561 |
| A430105l19Rik | -2.5507  |
| Srpk1         | -2.55356 |
| Hal           | -2.56079 |
| Cyp2w1        | -2.58114 |
| Ccdc113       | -2.58321 |
| Rgs18         | -2.58804 |

|         |              |
|---------|--------------|
| Gstm7   | -2.59689     |
| P2rx2   | -2.60141     |
| Clec2g  | -2.61508     |
| Celf5   | -2.62033     |
| Mboat2  | -2.62709     |
| Hsbp111 | -2.63345     |
| Srcin1  | -2.63683     |
| Bnip3   | -2.63998     |
| Celsr3  | -2.64697     |
| Ache    | -2.64787     |
| Xlr     | -2.65076     |
| Pnpla3  | -2.65269     |
| Ckb     | -2.65497     |
| Dapp1   | -2.66032     |
| Dusp18  | -2.66544     |
| Prss51  | -2.675393672 |
| Nav3    | -2.6813      |
| Gm9992  | -2.68497     |
| Cat     | -2.69188     |
| Rarres1 | -2.70369     |
| Frmpd1  | -2.72605     |
| Map2k6  | -2.72836     |
| Dkk1    | -2.73048     |

|               |          |
|---------------|----------|
| Arhgef26      | -2.73163 |
| Card9         | -2.73773 |
| 4930412C18Rik | -2.75324 |
| Chd5          | -2.7538  |
| C1qtnf1       | -2.75721 |
| Hsd11b2       | -2.76705 |
| Cobl          | -2.76839 |
| Ano8          | -2.78654 |
| Pcdh20        | -2.79357 |
| Wnt7a         | -2.81483 |
| Fcho1         | -2.82401 |
| Gng4          | -2.83438 |
| Il1f6         | -2.84503 |
| Alox5         | -2.85463 |
| Slc46a1       | -2.85826 |
| Tspyl4        | -2.86382 |
| Pde8b         | -2.87666 |
| Abca5         | -2.88805 |
| Nlrp10        | -2.88841 |
| Cpxm2         | -2.88848 |
| Adamts14      | -2.91274 |
| Cyp2b19       | -2.91365 |
| Npc1l1        | -2.92341 |

|               |          |
|---------------|----------|
| Slc2a6        | -2.92505 |
| Lefty1        | -2.94617 |
| Gpsm1         | -2.9541  |
| Rgs9bp        | -2.95477 |
| Lce6a         | -2.98231 |
| Grin2d        | -2.99591 |
| Creb3l1       | -3.00177 |
| Ankrd24       | -3.01421 |
| Rnase1        | -3.01587 |
| H2-M5         | -3.01937 |
| Myl7          | -3.0229  |
| A730017C20Rik | -3.02292 |
| Cd207         | -3.02542 |
| Il34          | -3.02602 |
| Dapl1         | -3.03723 |
| Hspa12a       | -3.05154 |
| Lor           | -3.05938 |
| 2010109I03Rik | -3.07045 |
| Penk          | -3.07779 |
| Adam19        | -3.09462 |
| Krt4          | -3.09734 |
| Il1f10        | -3.12609 |
| Klk5          | -3.12907 |

|               |          |
|---------------|----------|
| Gramd1c       | -3.13246 |
| Ecm1          | -3.13851 |
| Ano7          | -3.15425 |
| Clmn          | -3.16    |
| Tdrd1         | -3.16265 |
| Lnx1          | -3.17732 |
| Chi3l1        | -3.18217 |
| Rhpn1         | -3.20277 |
| Rtn4r         | -3.2332  |
| Arhgap24      | -3.28163 |
| Adh1          | -3.28829 |
| Slc36a2       | -3.28922 |
| Ccl6          | -3.30894 |
| Zfyve28       | -3.32486 |
| Ugt3a1        | -3.32508 |
| Hmox1         | -3.32562 |
| Gpr3          | -3.3392  |
| Adam12        | -3.37953 |
| N28178        | -3.38472 |
| Gad1          | -3.38706 |
| 5830418P13Rik | -3.41706 |
| Serpina12     | -3.41898 |
| Ankrd44       | -3.42092 |



|               |          |
|---------------|----------|
| Hnmt          | -3.42638 |
| Cldn23        | -3.45122 |
| A4galt        | -3.48064 |
| Tbc1d9        | -3.48876 |
| Ankrd23       | -3.50272 |
| Fhad1         | -3.5878  |
| Igf2          | -3.59154 |
| Irf7          | -3.60256 |
| Slc34a2       | -3.60829 |
| Susd2         | -3.63043 |
| C77370        | -3.65506 |
| Skint10       | -3.66936 |
| Fam163b       | -3.69641 |
| Pla2g3        | -3.70403 |
| Gca           | -3.75473 |
| Sptbn4        | -3.77354 |
| P2ry4         | -3.77376 |
| Agpat5        | -3.77534 |
| 4921536K21Rik | -3.7821  |
| Hsd17b14      | -3.81408 |
| Pdzrn4        | -3.86987 |
| Rgn           | -3.87526 |
| Paqr7         | -3.95242 |

|               |          |
|---------------|----------|
| Pla2g16       | -4.00387 |
| Aldh1a7       | -4.00903 |
| Gm438         | -4.06165 |
| Lce1b         | -4.1106  |
| Bsnd          | -4.13215 |
| Tfr2          | -4.14033 |
| Slurp1        | -4.1865  |
| Serpinb7      | -4.20237 |
| 2300005B03Rik | -4.20337 |
| Bcan          | -4.20461 |
| Wdr65         | -4.23339 |
| Tmc3          | -4.30519 |
| Nsg2          | -4.34627 |
| Trim15        | -4.38616 |
| Gm9705        | -4.41178 |
| Aif1l         | -4.4218  |
| Chga          | -4.44408 |
| Sod3          | -4.45823 |
| Capn9         | -4.49873 |
| Serpinb12     | -4.50688 |
| Sarm1         | -4.5211  |
| Tesc          | -4.53145 |
| Bicd1         | -4.64853 |

|               |              |
|---------------|--------------|
| Scara5        | -4.65654     |
| Ppfia4        | -4.74382     |
| Stk10         | -4.77173     |
| Sebox         | -4.83829     |
| Hpse          | -4.86749     |
| Skint2        | -4.93111     |
| Krt12         | -4.94216     |
| Pla2g5        | -5.3122      |
| Btc           | -5.32111     |
| Fmo2          | -5.39837     |
| Hgf           | -5.46585     |
| Gm20125       | -5.57028     |
| Skint11       | -5.76821     |
| Serpinb3a     | -6.13804     |
| AU021092      | -6.14072     |
| Lce1m         | -6.60274     |
| Cyp2f2        | -6.7029      |
| 1100001G20Rik | -7.70447     |
| Snord37       | -12.22748659 |
