# Supplementary material for: ΔNp63 regulates IL-33 and IL-31 signaling in atopic dermatitis
Source: PubMed Central journal article supplement — Cell Death Differ. 2016 Jan 15;23(6):1073–85. doi: 10.1038/cdd.2015.162 (PMC4987726; doi:10.1038/cdd.2015.162), 2016-01-15
Supplement: cdd2015162x5.pdf [file cdd2015162x5.pdf]

**Supplemental Table 2. List of primers.**

| <b>Amplicon</b> | <b>Forward sequence (5' -&gt; 3')</b> | <b>Reverse sequence (5' -&gt; 3')</b> | <b>Experiment type</b> |
|-----------------|---------------------------------------|---------------------------------------|------------------------|
| OSMR            | GGTATTGGGACACCTCAAAC                  | CATTAGGTATTAGGTATTTAGAG               | ChIP                   |
| IL31-RA         | GACACAGTACTCACAGTCAC                  | GGATGAGTGCTGTCTTGTG                   | ChIP                   |
| IL-31           | GAGTTCAACACTAGCCAGGTC                 | CTACCTTGTGAGCTGGTGAG                  | ChIP                   |
| IL-33           | CGCACCTCCTCGAAGTTGTCAAC               | CTCCTAAGCGGAAAGCAGTCGC                | ChIP                   |
| K14             | CCTCAGCTCCATAGACCCCTG                 | AACAGTGCAGGAGCCTCAGCG                 | ChIP                   |
| Cst10           | GTCAGGCTACACTTCTGCTG                  | GTGCAGGGCCTATCTCTAC                   | ChIP                   |
| Control         | GCCCCAACCAAGAAGACTAC                  | ATGTGAGTGCAACAATGGAA                  | ChIP                   |
| OSMR            | GTTGATTCATAGCTGGGGCGC                 | GGAGGAAGGCTGGATGAAGGAC                | qRT-PCR                |
| IL-33           | GGCAAAGTTCAGCAGCACCGCAG               | GGCCAGAACGGAGTCTCATGCAG               | qRT-PCR                |
| IL-25           | CCTTGGAGCTATGAGTTGGAC                 | GTCTGTAGGCTGACGCAG                    | qRT-PCR                |
| TSLP            | CCTTCACTCCCCGACAAAAC                  | CCGTCATTTCTCTCAGTTTCAG                | qRT-PCR                |
| IL-4            | GCATTTTGAACGAGGTCACAG                 | TGGAAGCCCTACAGACGAG                   | qRT-PCR                |
| IL-5            | CACCGAGCTCTGTTGACAAGC                 | GAGTAGGGACAGGAAGCCTCATC               | qRT-PCR                |
| IL-13           | GCCGGTGCCAAGATCTGTGTC                 | CTCCATACCATGCTGCCGTTG                 | qRT-PCR                |
| CCL17           | CAGGAAGTTGGTGAGCTGG                   | GACAGTCAGAAACACGATGG                  | qRT-PCR                |
| CCL22           | CTGATGCAGGTCCCTATGG                   | CAGAGGGTGACGGATGTAG                   | qRT-PCR                |
| IL-31           | CACACAGGAACAACGAAGCC                  | CGATATTGGGGCACCGAAG                   | qRT-PCR                |
| IL-31ra         | GTGACTGCTCCAACCTTTGCC                 | CACCCAGAGGCTGTTATTC                   | qRT-PCR                |
| CXCL9           | CTTCCTGGAGCAGTGTGGAGTTTCG             | GGGCTTGGGGCAAACCTGTTTGAG              | qRT-PCR                |
| CXCL10          | GTGCTGCCGTCATTTTCTGCCTC               | CTCATTCTCACTGGCCCGTCATC               | qRT-PCR                |
| IL-1 $\beta$    | CCTCTCCAGCCAAGCTTCCTTGTG              | GCAGCCCTTCATCTTTTGGGGTCC              | qRT-PCR                |

|                     |                            |                           |         |
|---------------------|----------------------------|---------------------------|---------|
| INF $\gamma$        | GCCACGGCACAGTCATTGAAAGCC   | GGCTCTGCAGGATTTTCATGTCACC | qRT-PCR |
| IL-12               | ACAGATGACATGGTGAAGACG      | TCGTTCTTGTGTAGTTCCAGTG    | qRT-PCR |
| IL-17a              | TCCAGAATGTGAAGGTCAACC      | TATCAGGGTCTTCATTGCGG      | qRT-PCR |
| IL-17f              | CATACCCAGGAAGACATACTTAGAAG | AGTCCCAACATCAACAGTAGC     | qRT-PCR |
| GAPDH               | CATGGCCTTCCGTGTTCTA        | CCTGCTTCACCACCTTCTTGAT    | qRT-PCR |
| human $\Delta$ Np63 | GAGCCAGAAGAAAGGACAGCAG     | GAATCTGCTGGTCCATGCTGTTC   | qRT-PCR |
| humanTAp63          | CCCAGAGCACACAGACAAATG      | GCGGATACAGTCCATGCTAATC    | qRT-PCR |
| humanGAPDH          | AGCCACATCGCTCAGACAC        | GCCCAATACGACCAAATCC       | qRT-PCR |
