# Supplementary figures and images for: ΔNp63 regulates IL-33 and IL-31 signaling in atopic dermatitis
Source: PubMed Central journal article supplement — Cell Death Differ. 2016 Jan 15;23(6):1073–85. doi: 10.1038/cdd.2015.162 (PMC4987726; doi:10.1038/cdd.2015.162), 2016-01-15

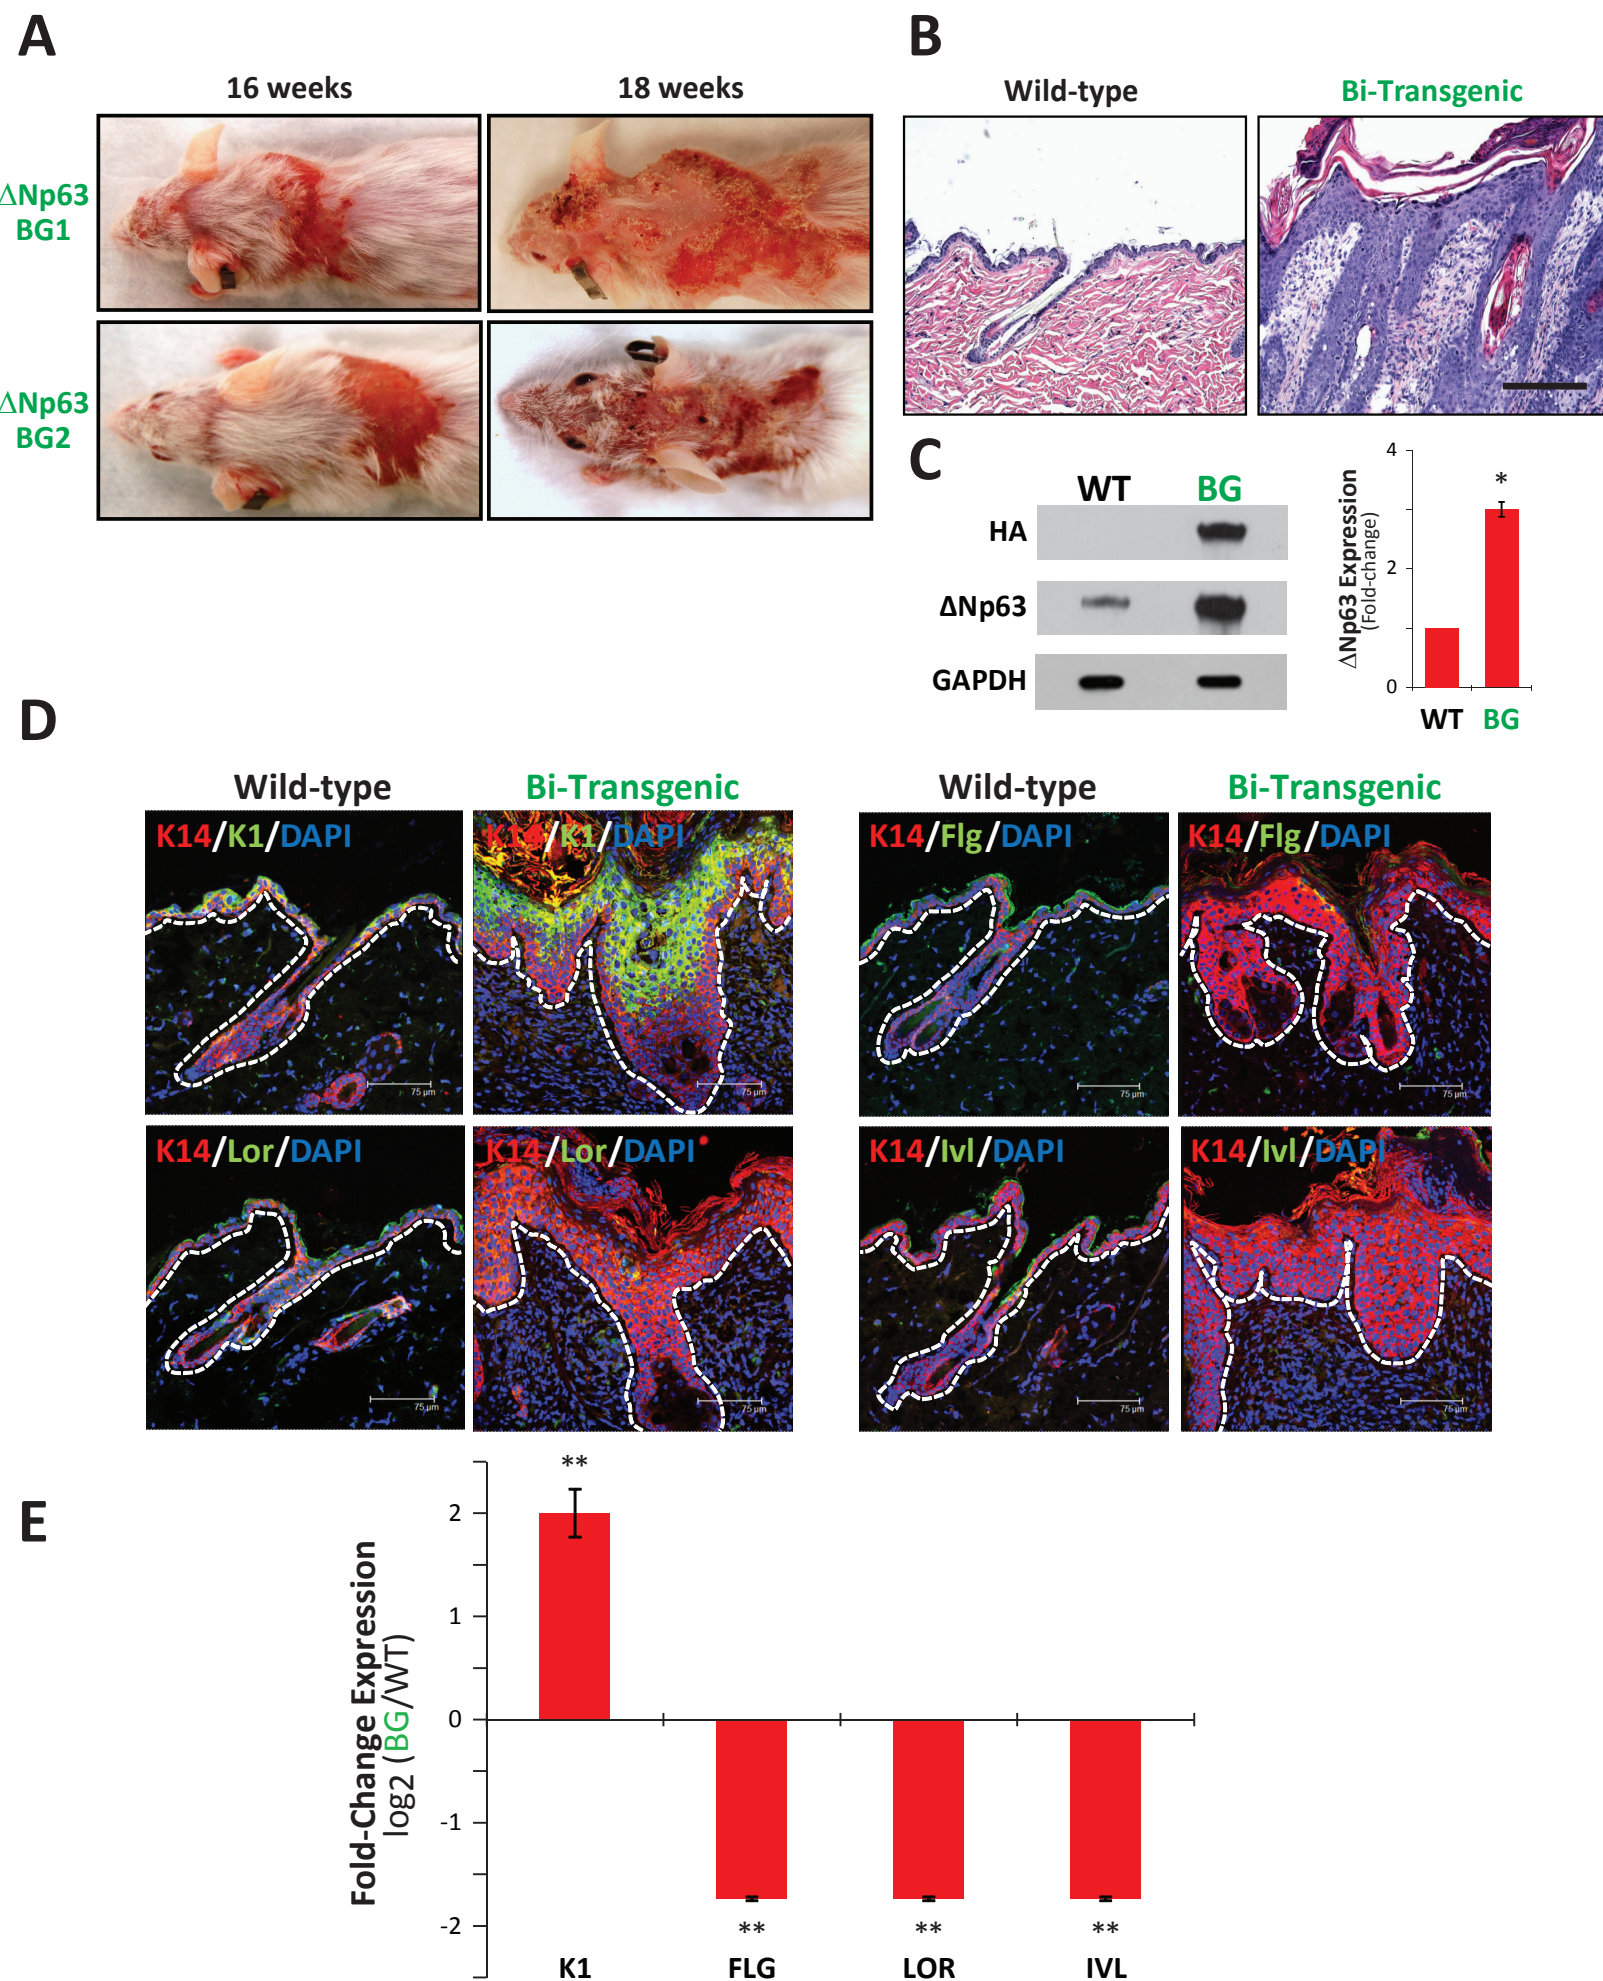

Supplemental Figure 1.

Supplement: cdd2015162x1.pdf [file cdd2015162x1.pdf]

**Atopic Dermatitis Skin**

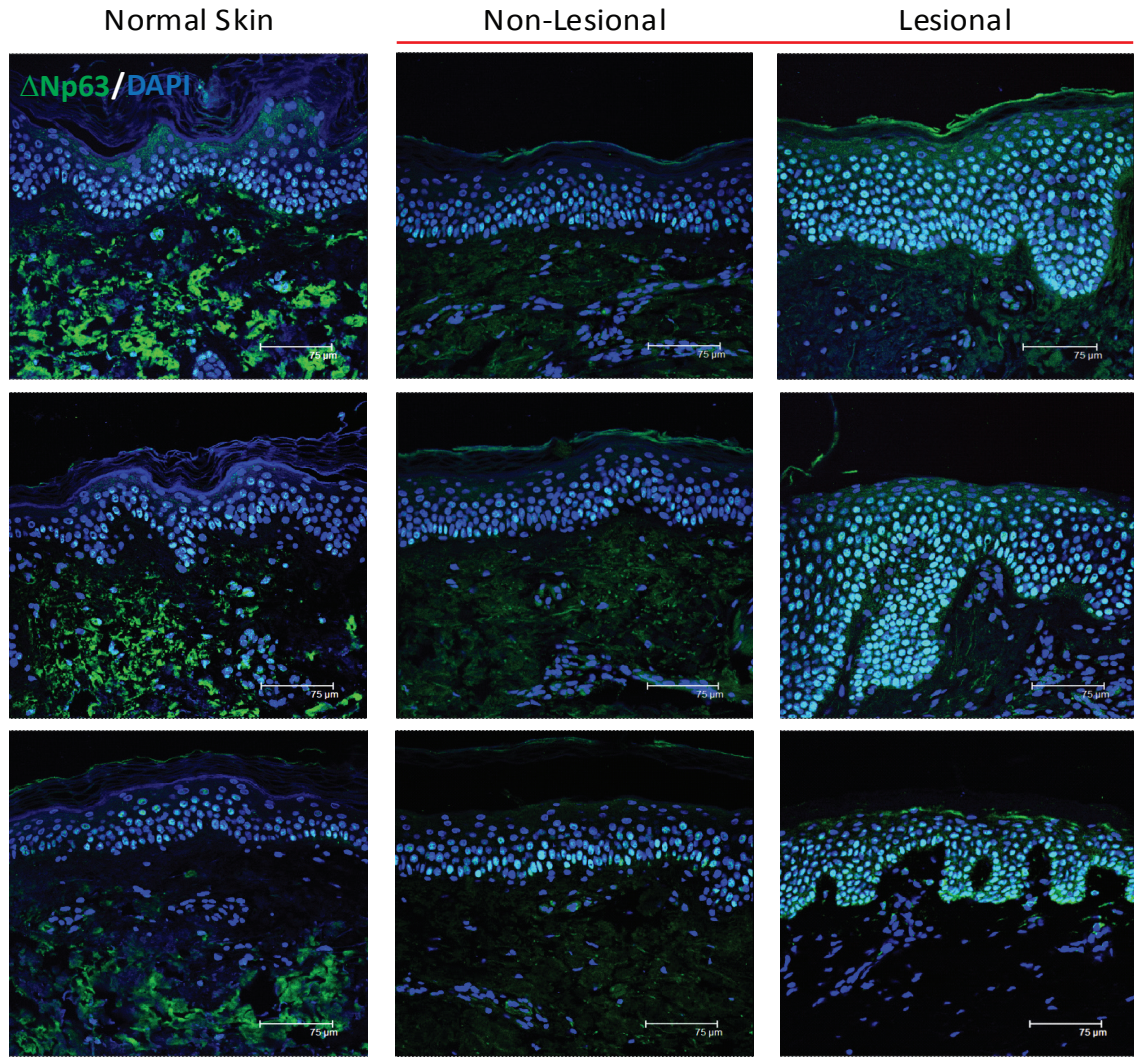

Supplemental Figure 2.

Supplement: cdd2015162x2.pdf [file cdd2015162x2.pdf]
